# Supplementary material for: Gut Microbiota Metabolite 3-Indolepropionic Acid Directly Activates Hepatic Stellate Cells by ROS/JNK/p38 Signaling Pathways
Source: MDPI journal article supplement (doi:10.3390/biom13101464), 2023-09-28
Supplement: s1 [file s1]

Supplementary Information for

Gut Microbiota Metabolite 3-Indolepropionic Acid Directly Activates  
Hepatic Stellate Cells by ROS/JNK/p38 Signaling Pathways

**Xiaoyan Yuan<sup>1,2,3†</sup>, Junting Yang<sup>2,4†</sup>, Yuling Huang<sup>2,5</sup>, Jia Li<sup>1,2,3,5\*</sup>, Yuanyuan Li<sup>1,2,3,5\*</sup>**

<sup>1</sup> Shanghai Institute of Materia Medica, Chinese Academy of Sciences, Shanghai 201203, China; s20-yuanxiaoyan@simmm.ac.cn (X.Y.)

<sup>2</sup> Zhongshan Institute for Drug Discovery, Shanghai Institute of Materia Medica, Chinese Academy of Sciences, Zhongshan 528400, China; yjt1481@mail.dlut.edu.cn; huangyuling2605@163.com (Y.H.)

<sup>3</sup> University of Chinese Academy of Sciences, Beijing 100049, China

<sup>4</sup> School of Life and Pharmaceutical Sciences, Dalian University of Technology, Dalian 116024, China

<sup>5</sup> School of Pharmaceutical Sciences, Southern Medical University, Guangzhou 510515, China

\* Correspondence: Jia Li, jli@simmm.ac.cn; Yuanyuan Li, liyuanyuan@simmm.ac.cn

† These authors contributed equally to this work

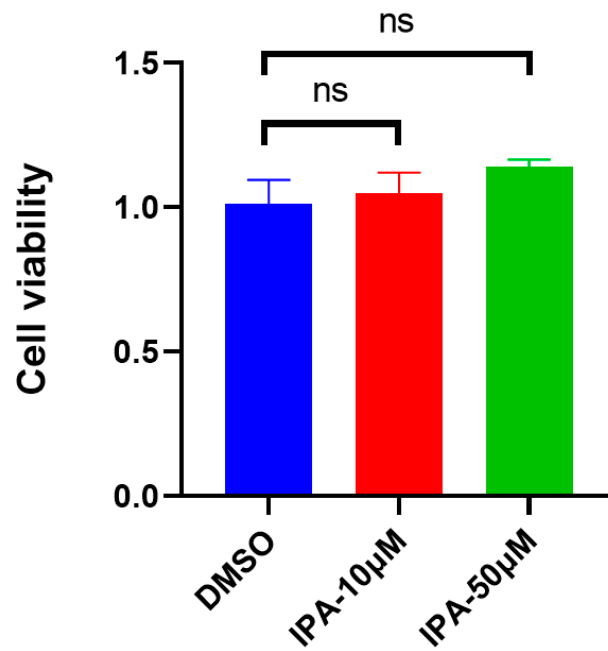

**Supplemental Figure S1.** Effects of IPA on the cell viability of LX-2. LX-2 cells were treated with either 10μM or 50μM IPA for 24h, the cell viability was determined using MTT assay. DMSO as the control group. n=4. Data are shown as mean ± SEM, ns means no significant differences.

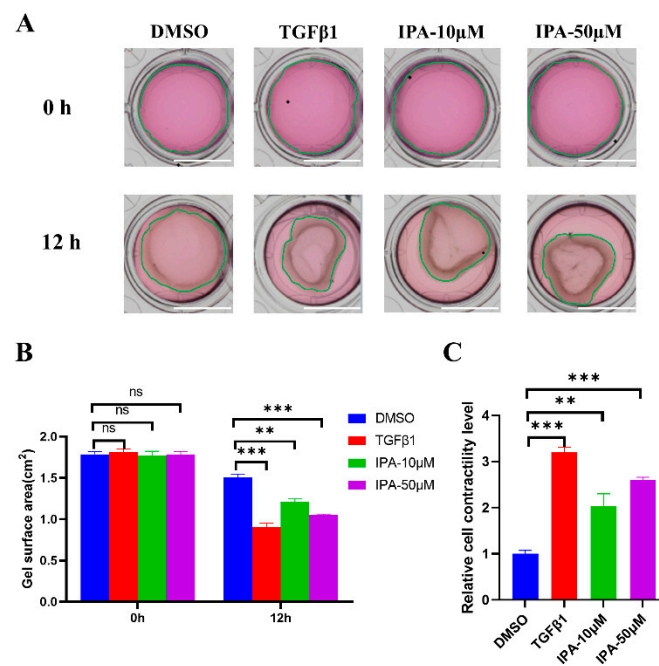

**Supplemental Figure S2.** Effects of IPA on the contractility of LX-2 cells. (A) LX-2 cells were incubated with either 10  $\mu$ M or 50  $\mu$ M of IPA for 12 h. The levels of cell contractility were determined using gel contraction assay. Treatment with TGF $\beta$ 1 (5 ng/ml) was used as a positive control. The green line shows the edge of the gel. Scale bar, 1cm. (B) The quantitative analysis of gel surface area at 0 h and 24 h. (C) The quantitative analysis of the cell contractility in (A). The level of cell contractility was calculated by (Area(0 h)-Area(12 h))/Area(0 h) and the result was normalized to DMSO treated group. Data are shown as mean  $\pm$  SEM, \*\*:  $p < 0.01$ , \*\*\*:  $p < 0.001$ . ns means no significant differences.

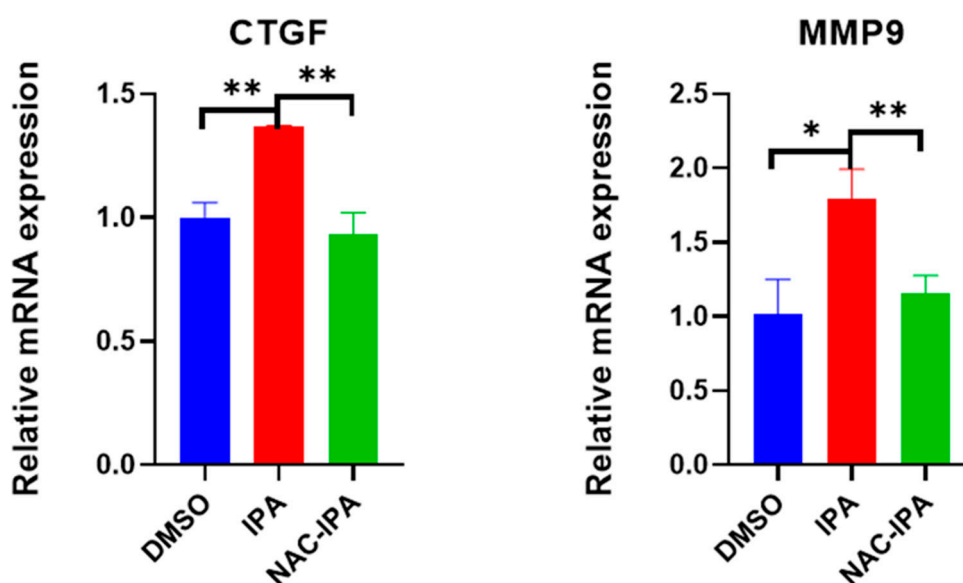

**Supplemental Figure S3.** Inhibition of ROS pathway downregulated fibrogenic genes *CTGF* and *MMP9*. LX-2 cells were pre-incubated with NAC(Acetylcysteine) for 2h, and then treated with IPA for 24h, the RNA levels of *CTGF* and *MMP9* were detected using RT-qPCR. n=3. Data are shown as mean $\pm$  SEM, \*:  $p < 0.05$ , \*\*:  $p < 0.01$ .

| Gene          | Forward sequence       | Reverse sequence         |
|---------------|------------------------|--------------------------|
| <i>COL1A1</i> | ATCCACCAATCACCTGCGT    | TCATCGCACAACACCTTGCC     |
| <i>COL5A1</i> | GGAGATGATGGTCCCAAAGGCA | CCATCATCTCCTTTGTCAACCAGG |
| <i>COL5A2</i> | CAGGCTCCATAGGAATCAGAGG | CCAGCATTTCTGCTTCTCCAG    |
| <i>CTGF</i>   | ATGGTGCTCCCTGCATCTTC   | GTTTGGTCCTTGGGCTCGTC     |
| <i>MMP2</i>   | TCCCATTTTGATGACGATGA   | CCGTACTTGCCATCCTTCTC     |
| <i>MMP9</i>   | CGGCCACTACTGTGCCTTT    | GCGATGGCGTCGAAGATG       |
| <i>MCPI</i>   | GACCCCAAGCAGAAGTGGGT   | GTGTCTGGGGAAAGCTAGGGG    |

|              |                           |                           |
|--------------|---------------------------|---------------------------|
| <i>IL6</i>   | TTCCAAAGATGTAGCCGCCC      | GATGCCGTCGAGGATGTACC      |
| <i>IL1b</i>  | TCCTTTCAGGGCCAATCCCC      | GGGAGCGAATGACAGAGGGT      |
| <i>HPRT1</i> | TGCTGAGGATTTGGAAAGGGTGTTT | GCACACAGAGGGCTACAATGTGATG |

---

***Supplemental Table S1.*** Primers for RT-qPCR.
